# Supplementary material
Source: MDPI journal article supplement (https://www.mdpi.com/1424-8247/16/4/602)
Supplement: s1 [file s1]

## Supplementary Materials

# Manganese (II) Complex of 1,4,7-Triazacyclononane-1,4,7-Triacetic Acid (NOTA) as a Hepatobiliary MRI Contrast Agent

Md. Kamrul Islam <sup>1</sup>, Ah-Rum Baek <sup>1</sup>, Byeong-Woo Yang <sup>2</sup>, Soyeon Kim <sup>3</sup>, Dong Wook Hwang <sup>4</sup>, Sung-Wook Nam <sup>4</sup>, Gang-Ho Lee <sup>5</sup> and Yongmin Chang <sup>2,4,6,\*</sup>

<sup>1</sup> Institute of Biomedical Engineering Research, Kyungpook National University, Daegu 41405, Republic of Korea

<sup>2</sup> Department of Medical and Biological Engineering, School of Medicine, Kyungpook National University, Daegu 41944, Republic of Korea

<sup>3</sup> Division of RI-Convergence Research, Korea Institute of Radiological and Medical Sciences, Seoul 01812, Republic of Korea

<sup>4</sup> Department of Molecular Medicine, School of Medicine, Kyungpook National University, Daegu 41944, Republic of Korea

<sup>5</sup> Department of Chemistry, Kyungpook National University, 80, Daehak-ro, Buk-gu, Daegu 41566, Republic of Korea

<sup>6</sup> Department of Radiology, Kyungpook National University Hospital, Daegu 41944, Republic of Korea

\* Correspondence: ychang@knu.ac.kr; Tel.: +82-53-420-5471

# Table of Contents

|     |                                                                                                                                                    |    |
|-----|----------------------------------------------------------------------------------------------------------------------------------------------------|----|
| 1.  | <b>Figure S1.</b> $^1\text{H}$ NMR spectrum of compound <b>2</b> .                                                                                 | S3 |
| 2.  | <b>Figure S2.</b> $^{13}\text{C}$ NMR spectrum of compound <b>2</b> .                                                                              | S3 |
| 3.  | <b>Figure S3.</b> High-resolution mass spectrum of compound <b>2</b> .                                                                             | S4 |
| 4.  | <b>Figure S4.</b> $^1\text{H}$ NMR spectrum of compound <b>3</b> .                                                                                 | S4 |
| 5.  | <b>Figure S5.</b> High-resolution mass spectrum of compound <b>3</b> .                                                                             | S5 |
| 6.  | <b>Figure S6.</b> $^1\text{H}$ NMR spectrum of compound <b>NOTA-NP</b> .                                                                           | S5 |
| 7.  | <b>Figure S7.</b> $^{13}\text{C}$ NMR spectrum of compound <b>NOTA-NP</b> .                                                                        | S6 |
| 8.  | <b>Figure S8.</b> High-resolution mass spectrum of compound <b>NOTA-NP</b> .                                                                       | S6 |
| 9.  | <b>Figure S9.</b> HR-ESI-MS spectrum of compound <b>Mn-NOTA-NP</b> .                                                                               | S7 |
| 10. | <b>Figure S10.</b> HPLC spectrum of compound <b>Mn-NOTA-NP</b> .                                                                                   | S7 |
| 11. | <b>Figure S11.</b> HSA binding of <b>Mn-NOTA-NP</b> .                                                                                              | S8 |
| 12. | <b>Figure S12.</b> pH Stability of <b>Mn-NOTA-NP</b> .                                                                                             | S8 |
| 13. | <b>Figure S13.</b> Schematic representations of variable interactions between Mn-EDTA-BTA and (a) OATP1B1, (b) OATP1B3, and (c) MRP2 transporters. | S9 |
| 14. | <b>Figure S14.</b> Schematic representations of variable interactions between (a) Mn-EDTA-EOB and (b) Gd-DTPA-EOB with MRP2 transporter.           | S9 |

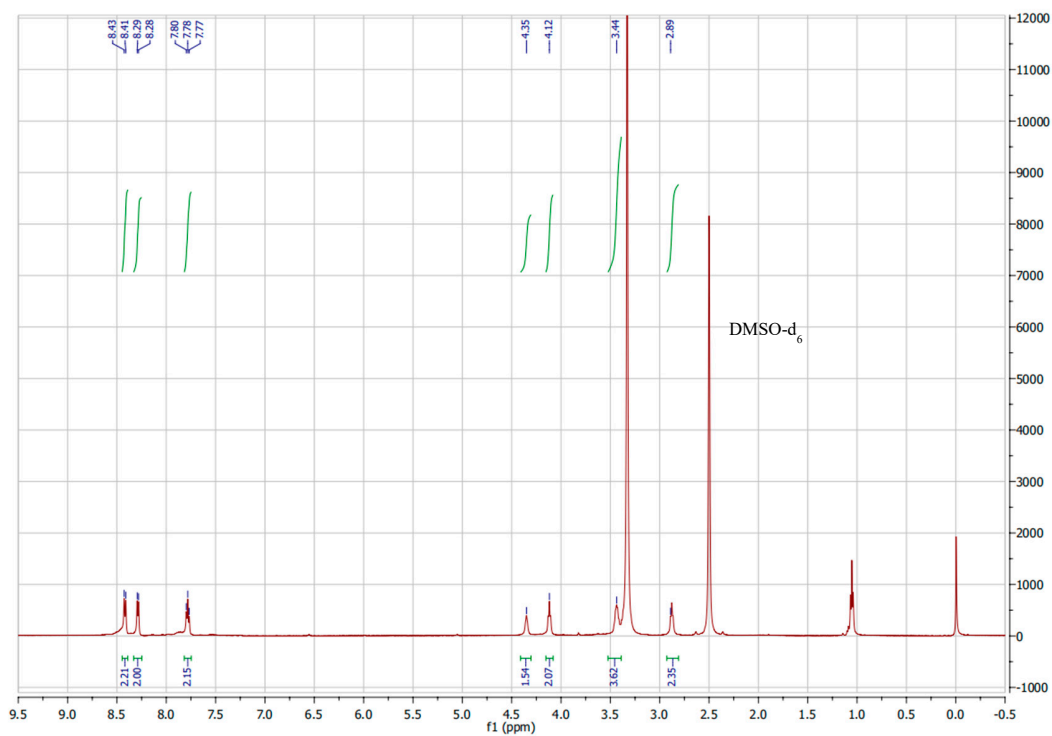

**Figure S1.** <sup>1</sup>H NMR spectrum of compound 2.

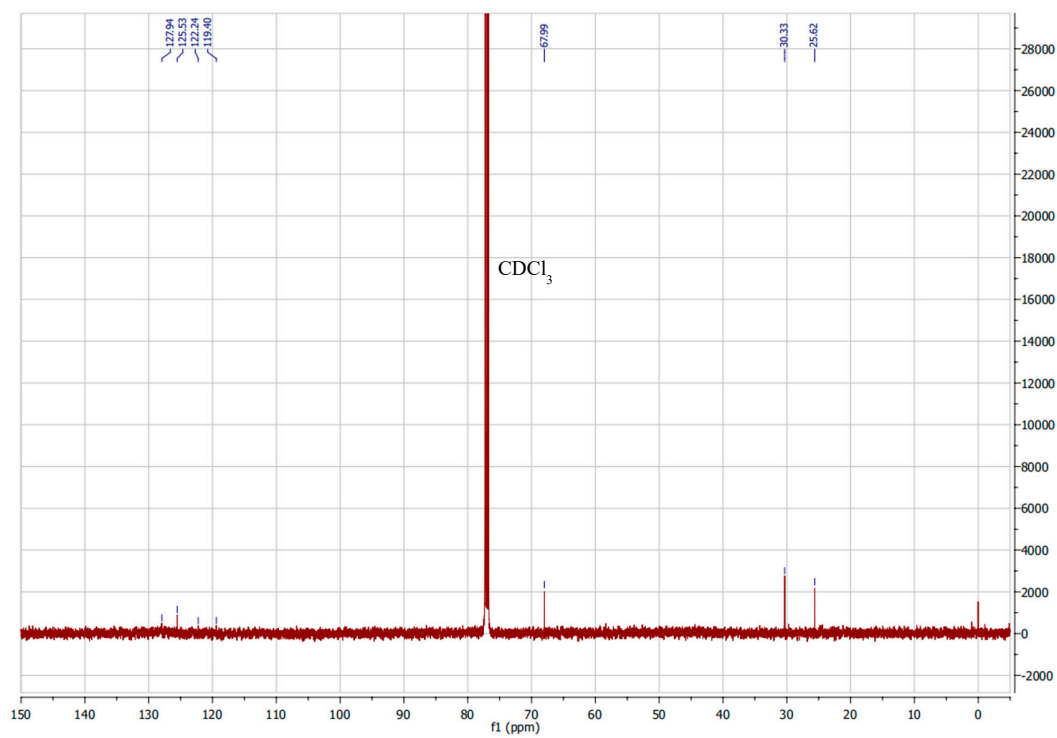

**Figure S2.** <sup>13</sup>C NMR spectrum of compound 2.

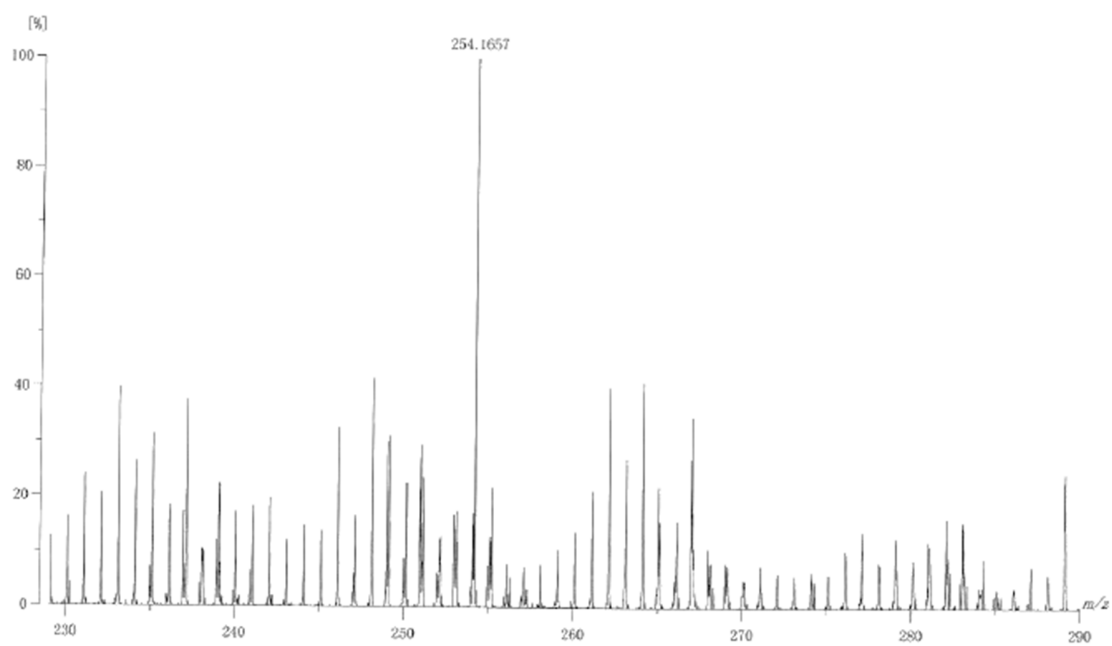

**Figure S3.** HR-FAB-MS spectrum for compound 2.

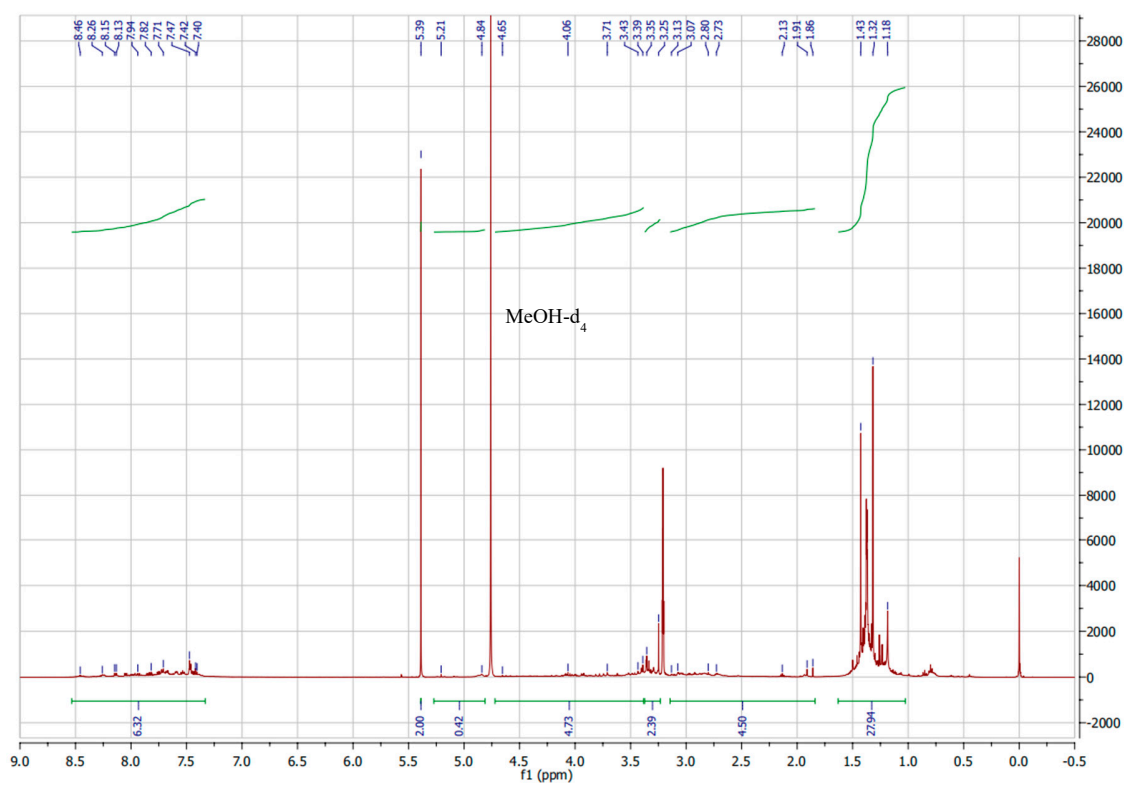

**Figure S4.**  $^1\text{H}$  NMR spectrum of compound 3.

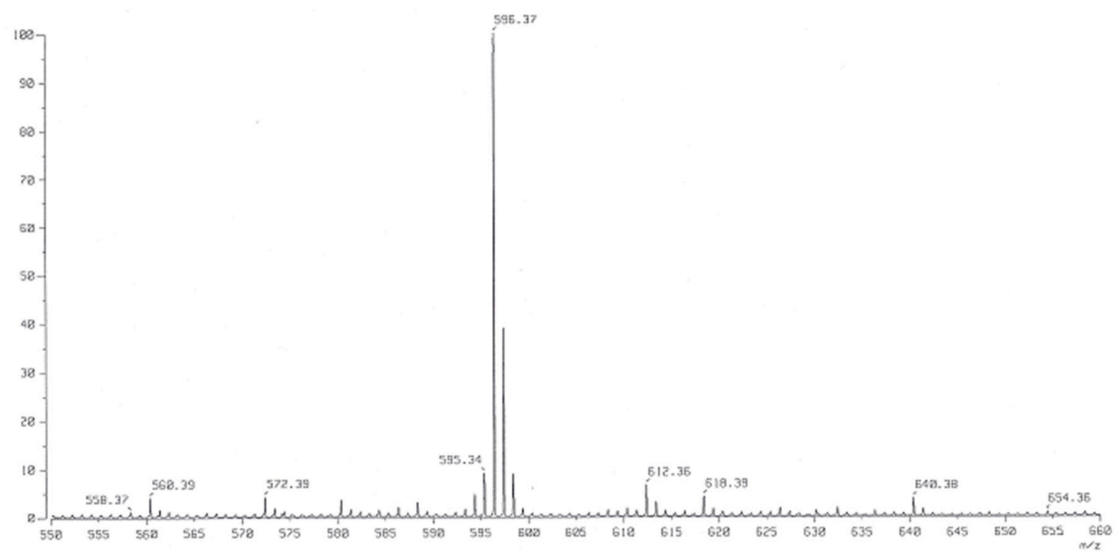

**Figure S5.** HR-FAB-MS spectrum for compound 3.

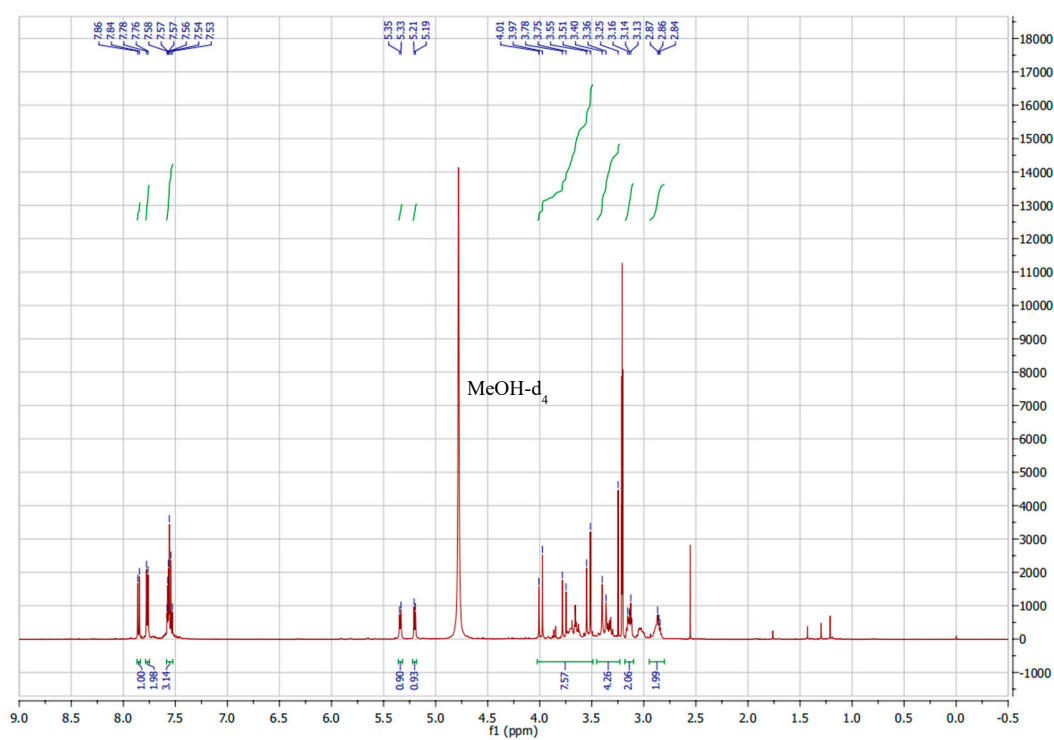

**Figure S6.**  $^1\text{H}$  NMR spectrum of NOTA-NP.

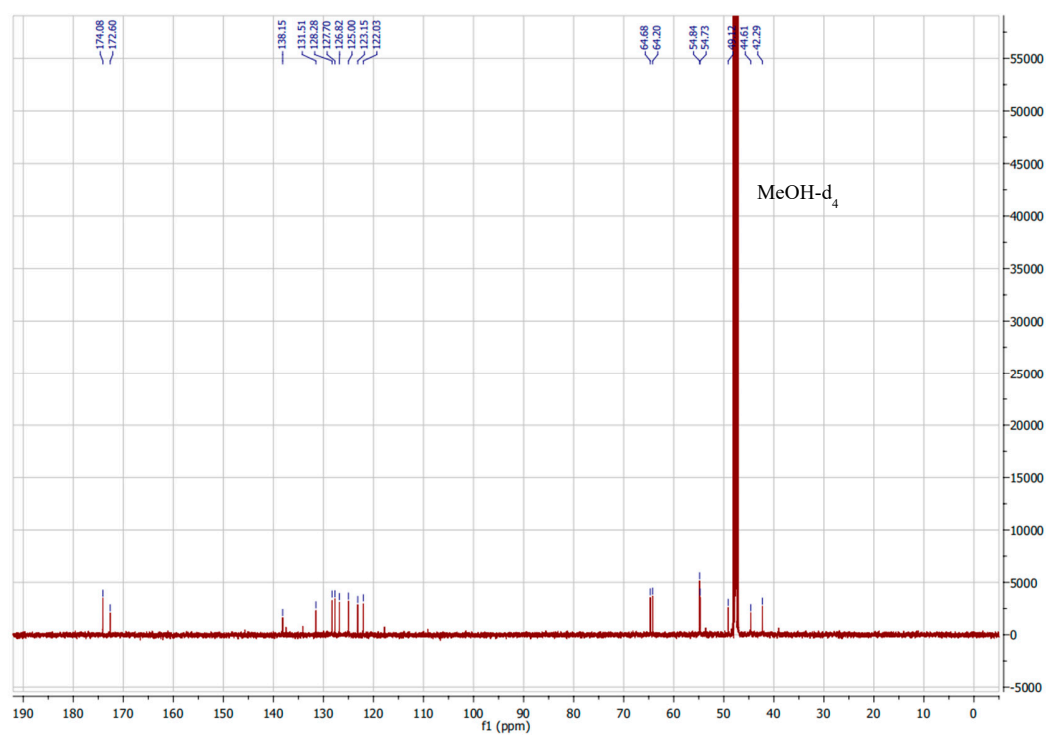

**Figure S7.** <sup>13</sup>C NMR spectrum of NOTA-NP.

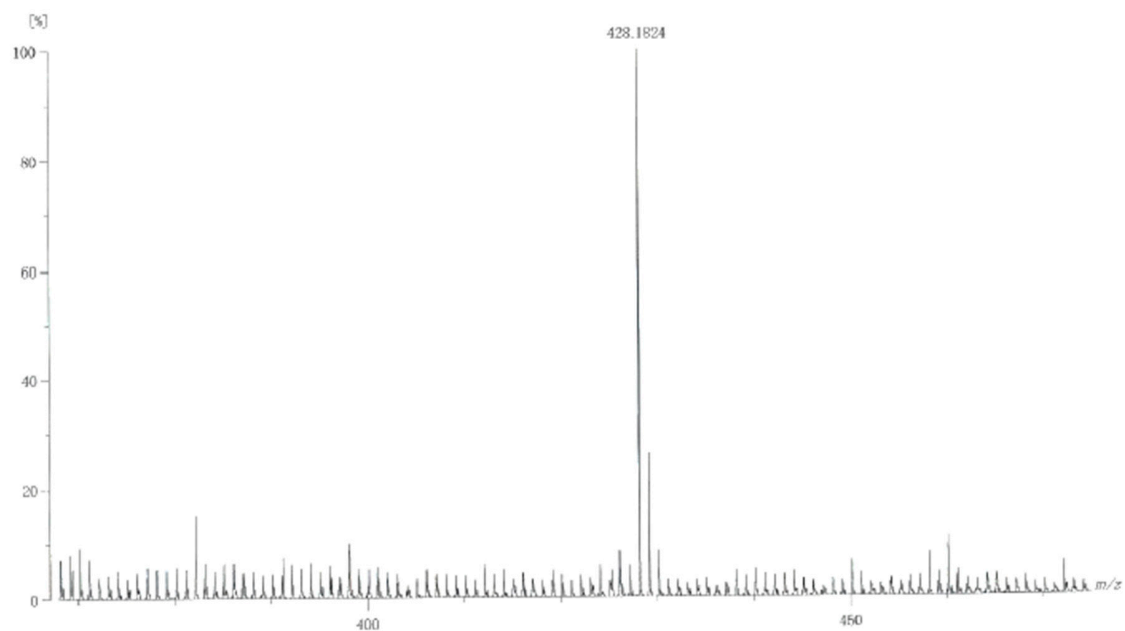

**Figure S8.** HR-FAB-MS spectrum of compound NOTA-NP.

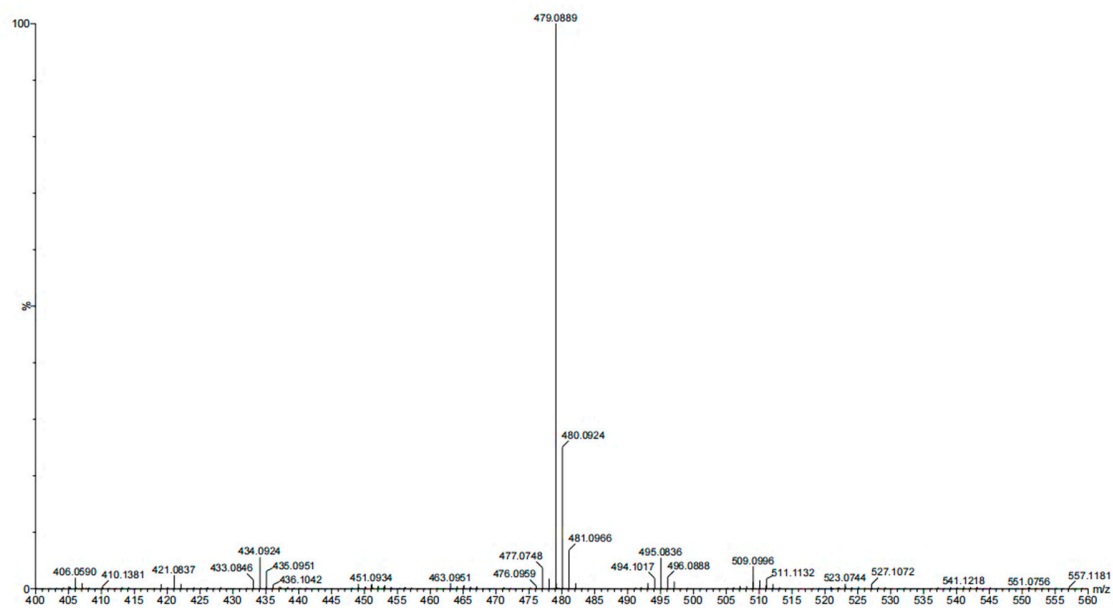

**Figure S9.** HR-ESI-MS spectrum of compound **Mn-NOTA-NP**.

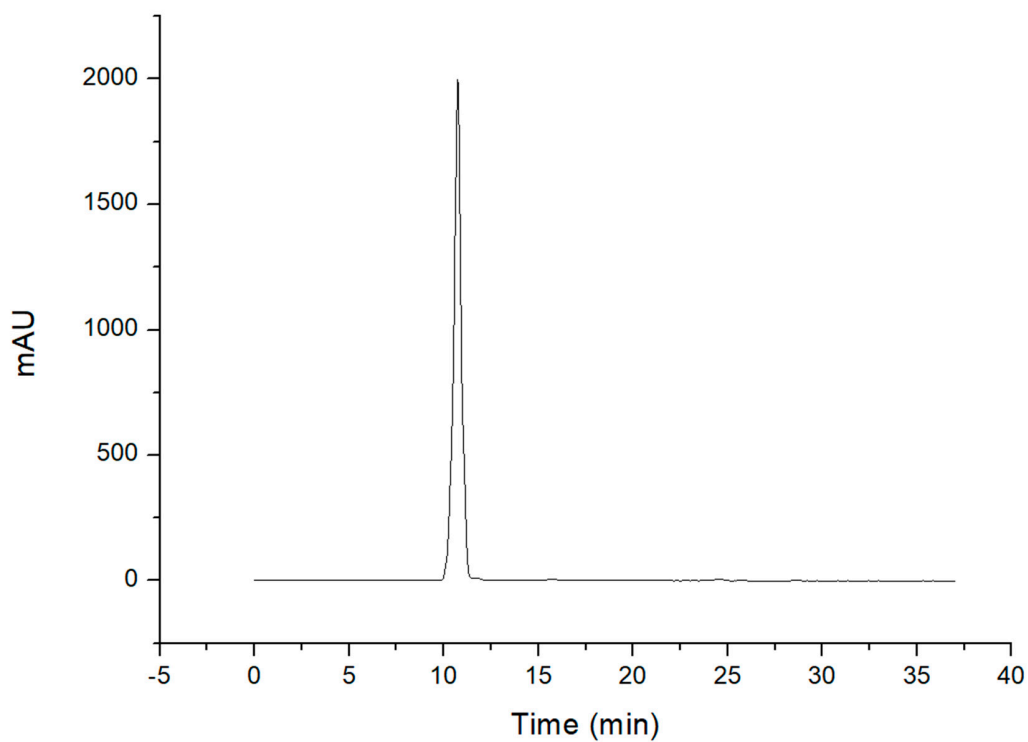

**Figure S10.** HPLC spectrum of compound **Mn-NOTA-NP** at 254 nm detection with 96.05% purity.

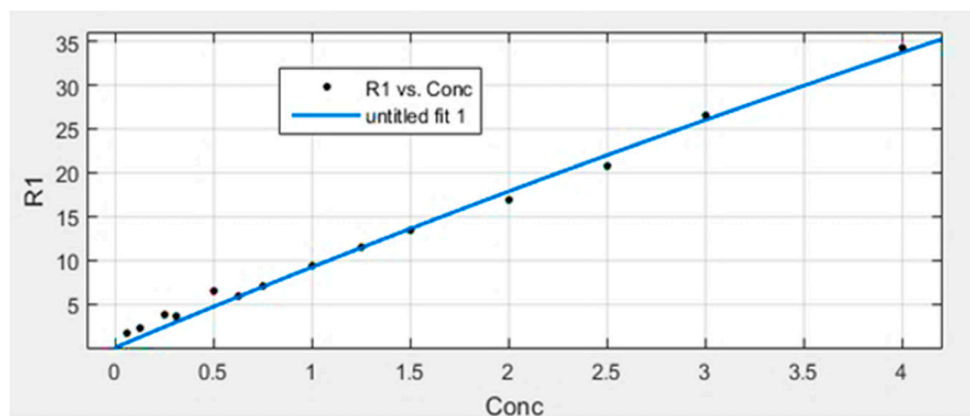

**Figure S11.** Proton longitudinal paramagnetic relaxation rates of **Mn-NOTA-NP** as a function of Mn concentration in an aqueous solution of HSA (0.67 mM) at 64 MHz and 293 K.

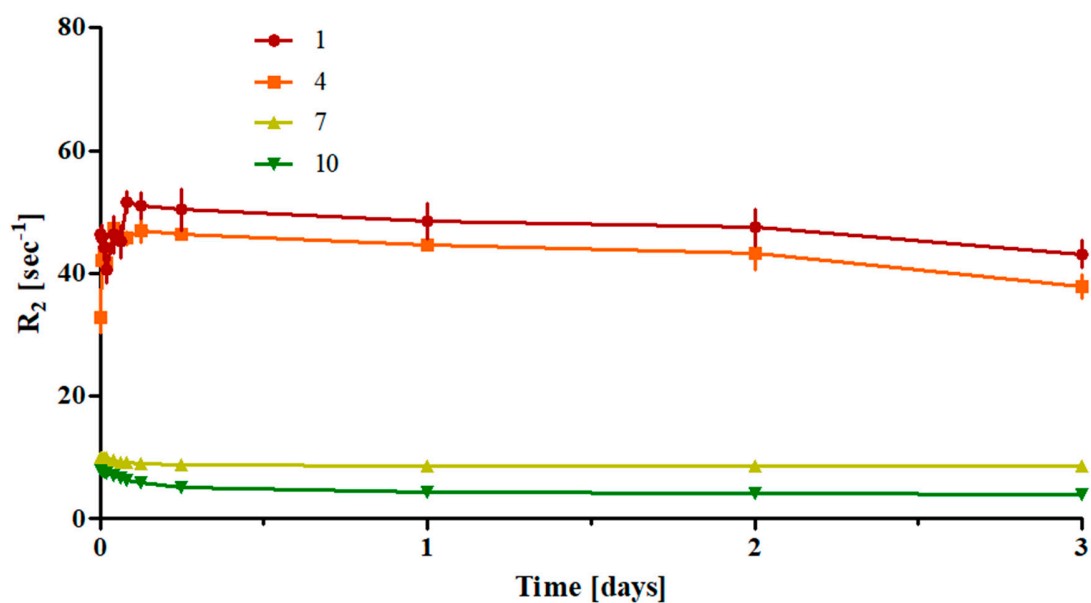

**Figure S12.** Stability of **Mn-NOTA-NP** ([Mn] = 1.0 mM) in different pH buffer solutions as a function of incubation time at 3 T and 293 K.



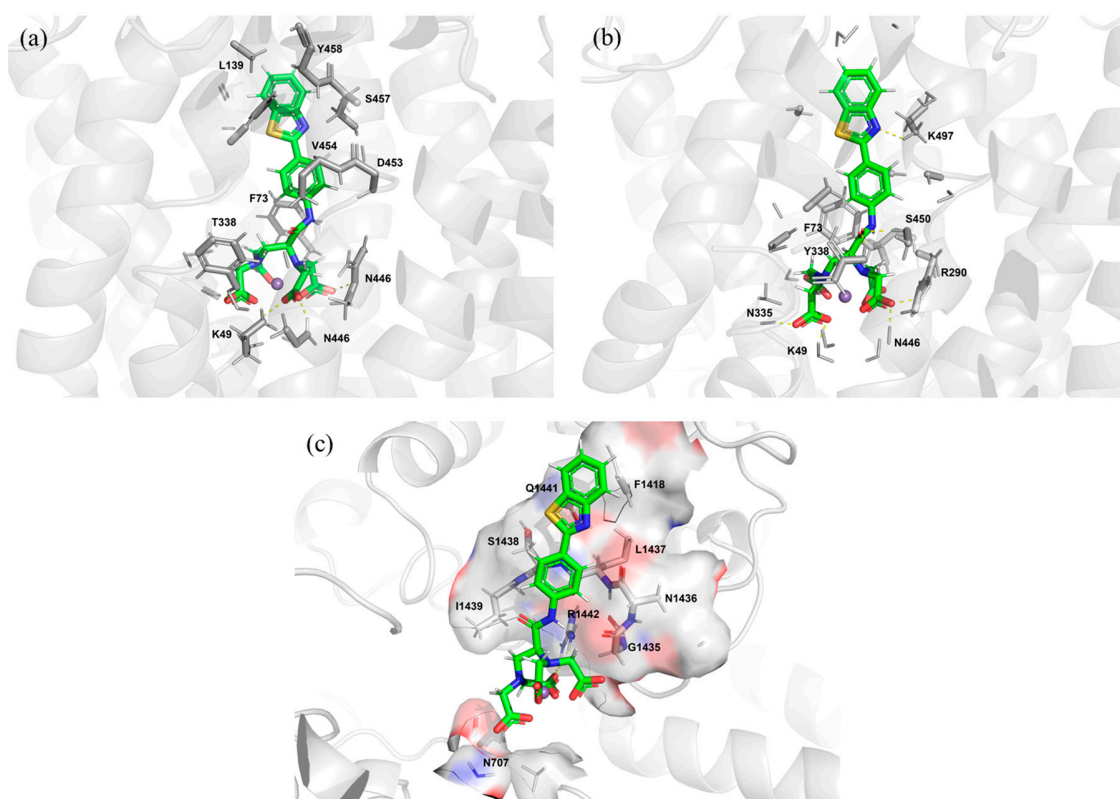

**Figure S13.** Schematic representations of variable interactions between Mn-EDTA-BTA and (a) OATP1B1, (b) OATP1B3, and (c) MRP2 transporters. The yellow line represents hydrogen bonds.

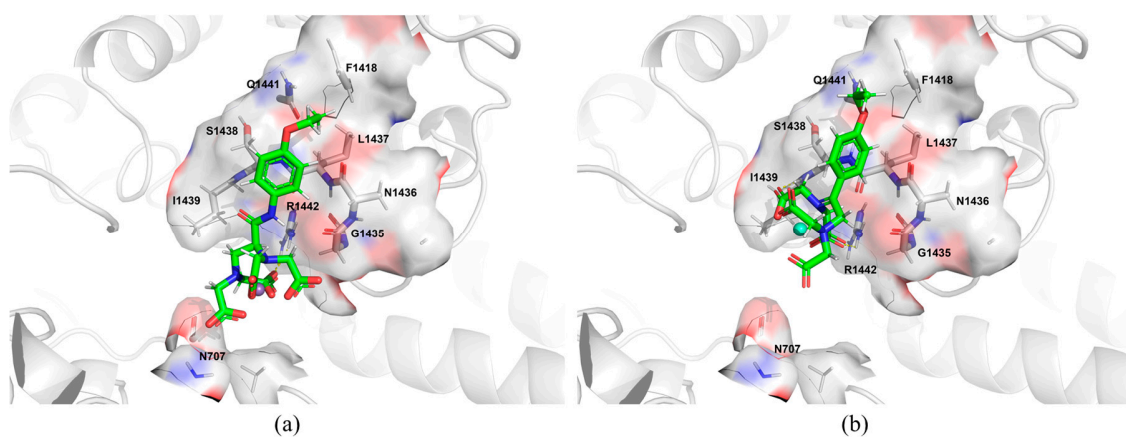

**Figure S14.** Schematic representations of variable interactions between (a) Mn-EDTA-EOB and (b) Gd-DTPA-EOB with MRP2 transporter. The yellow line represents hydrogen bonds.
